# Supplementary material for: PFKFB4 interacts with FBXO28 to promote HIF-1α signaling in glioblastoma
Source: PubMed Central journal article supplement (PMC9482633; doi:10.1038/s41389-022-00433-3), 2022-09-17
Supplement: 41389_2022_433_MOESM3_ESM.pdf [file 41389_2022_433_MOESM3_ESM.pdf]

# **PFKFB4 interacts with FBXO28 to promote HIF-1 $\alpha$ signaling in glioblastoma**

Emma Phillips<sup>1</sup>, Jörg Balss<sup>1</sup>, Frederic Bethke<sup>1</sup>, Stefan Pusch<sup>2,3</sup>, Stefan Christen<sup>4,5</sup>, Thomas Hielscher<sup>6</sup>, Martina Schnölzer<sup>7</sup>, Michael N. C. Fletcher<sup>8</sup>, Antje Habel<sup>2</sup>, Claudia Tessmer<sup>9</sup>, Lisa-Marie Brenner<sup>1</sup>, Mona Göttmann<sup>1</sup>, David Capper<sup>2,3,10</sup>, Christel Herold-Mende<sup>11</sup>, Andreas von Deimling<sup>2,3</sup>, Sarah-Maria Fendt<sup>4,5</sup>, and Violaine Goidts<sup>1</sup>

## Supplementary Tables

**Table S1:** Gene Set Enrichment Analysis of the transcriptome of GSCs upon *PFKFB4* silencing using the gene sets that represent expression signatures of genetic and chemical perturbations. Signatures with a false discovery rate of less than 25% are shown.

| Rank | NAME                                               | SIZE <sup>a</sup> | ES     | NES    | NOM p-val | FDR q-val <sup>b</sup> |
|------|----------------------------------------------------|-------------------|--------|--------|-----------|------------------------|
| 1    | VERHAAK GLIOBLASTOMA PRONEURAL                     | 174               | -0.573 | -2.011 | 0         | 0.005                  |
| 2    | HOELZEL NF1 TARGETS DN                             | 106               | -0.602 | -1.992 | 0         | 0.005                  |
| 3    | CONCANNON APOPTOSIS BY EPOXOMICIN DN               | 164               | -0.524 | -1.827 | 0         | 0.050                  |
| 4    | MARTORIATI MDM4 TARGETS NEUROEPITHELIUM DN         | 154               | -0.500 | -1.748 | 0         | 0.107                  |
| 5    | RICKMAN TUMOR DIFFERENTIATED WELL VS MODERATELY UP | 102               | -0.526 | -1.743 | 0         | 0.109                  |
| 6    | RICKMAN TUMOR DIFFERENTIATED WELL VS POORLY UP     | 227               | -0.484 | -1.736 | 0         | 0.118                  |
| 7    | NIKOLSKY BREAST CANCER 17Q11 Q21 AMPLICON          | 125               | -0.505 | -1.724 | 0         | 0.124                  |
| 8    | BASAKI YBX1 TARGETS DN                             | 365               | -0.448 | -1.678 | 0         | 0.163                  |
| 9    | ELVIDGE HIF1A AND HIF2A TARGETS DN                 | 102               | -0.511 | -1.684 | 0         | 0.169                  |
| 10   | QI HYPOXIA                                         | 134               | -0.484 | -1.657 | 0.003     | 0.182                  |
| 11   | DEBIASI APOPTOSIS BY REOVIRUS INFECTION DN         | 282               | -0.456 | -1.659 | 0         | 0.186                  |
| 12   | NIKOLSKY BREAST CANCER 20Q12 Q13 AMPLICON          | 134               | -0.471 | -1.617 | 0         | 0.224                  |
| 13   | SENESE HDAC1 TARGETS DN                            | 237               | -0.435 | -1.580 | 0.002     | 0.224                  |
| 14   | WANG CLIM2 TARGETS UP                              | 240               | -0.438 | -1.578 | 0         | 0.225                  |
| 15   | HOOI ST7 TARGETS DN                                | 114               | -0.480 | -1.604 | 0.004     | 0.227                  |
| 16   | ONDER CDH1 TARGETS 1 UP                            | 136               | -0.460 | -1.580 | 0         | 0.228                  |
| 17   | REACTOME NEURONAL SYSTEM                           | 275               | -0.433 | -1.580 | 0         | 0.229                  |
| 18   | MORI EMU MYC LYMPHOMA BY ONSET TIME UP             | 102               | -0.480 | -1.593 | 0.003     | 0.231                  |
| 19   | RODRIGUES DCC TARGETS DN                           | 120               | -0.473 | -1.600 | 0         | 0.232                  |
| 20   | BLUM RESPONSE TO SALIRASIB DN                      | 340               | -0.424 | -1.581 | 0         | 0.233                  |
| 21   | BERENJENO TRANSFORMED BY RHOA DN                   | 384               | -0.418 | -1.566 | 0         | 0.238                  |
| 22   | XU GH1 AUTOCRINE TARGETS DN                        | 133               | -0.456 | -1.553 | 0.001     | 0.239                  |
| 23   | KEGG SYSTEMIC LUPUS ERYTHEMATOSUS                  | 124               | -0.459 | -1.564 | 0.004     | 0.239                  |
| 24   | REACTOME TRANSMISSION ACROSS CHEMICAL SYNAPSES     | 183               | -0.440 | -1.560 | 0         | 0.240                  |
| 25   | PECE MAMMARY STEM CELL DN                          | 134               | -0.457 | -1.567 | 0         | 0.240                  |
| 26   | MARKEY RB1 CHRONIC LOF UP                          | 112               | -0.468 | -1.550 | 0.003     | 0.242                  |
| 27   | NIKOLSKY BREAST CANCER 16P13 AMPLICON              | 108               | -0.460 | -1.541 | 0.008     | 0.248                  |

<sup>a</sup>Gene sets of more than 100 genes were selected for the analysis. <sup>b</sup>The data are sorted according to the FDR.

**Table S2:** Interaction partners of PFKFB4 in NCH421k GSCs. PFKFB4 was immunoprecipitated from NCH421k lysate and subjected to mass spectrometry. Proteins were only considered if three or more unique peptide sequences were identified.

| Gene Symbol | Mass [kDa] | Replicate | Mascot Score | # significant peptides | Coverage [%] |  |
|-------------|------------|-----------|--------------|------------------------|--------------|--|
| PFKFB4      | 54.7       | 1         | 1413         | 20                     | 57           |  |
|             |            | 2         | 978          | 15                     | 44           |  |
|             |            | 3         | 1210         | 21                     | 56           |  |
|             |            | Ctr 1     | not detected |                        |              |  |
|             |            | Ctr 2     | not detected |                        |              |  |
|             |            |           |              |                        |              |  |
| PFKFB2      | 59         | 1         | 751          | 12                     | 29           |  |
|             |            | 2         | 686          | 10                     | 30           |  |
|             |            | 3         | 893          | 14                     | 37           |  |
|             |            | Ctr 1     | not detected |                        |              |  |
|             |            | Ctr 2     | not detected |                        |              |  |
|             |            |           |              |                        |              |  |
| FBXO28      | 41.4       | 1         | 423          | 5                      | 18           |  |
|             |            | 2         | 634          | 10                     | 30           |  |
|             |            | 3         | 636          | 9                      | 30           |  |
|             |            | Ctr 1     | not detected |                        |              |  |
|             |            | Ctr 2     | not detected |                        |              |  |
|             |            |           |              |                        |              |  |
| BDH2        | 27         | 1         | 350          | 5                      | 30           |  |
|             |            | 2         | 434          | 6                      | 34           |  |
|             |            | 3         | 563          | 8                      | 43           |  |
|             |            | Ctr 1     | not detected |                        |              |  |
|             |            | Ctr 2     | not detected |                        |              |  |
|             |            |           |              |                        |              |  |
| PFKFB3      | 60.4       | 1         | 469          | 7                      | 15           |  |
|             |            | 2         | 349          | 5                      | 15           |  |
|             |            | 3         | 419          | 7                      | 20           |  |
|             |            | Ctr 1     | not detected |                        |              |  |
|             |            | Ctr 2     | not detected |                        |              |  |

**Table S3:** Information about patient-derived glioblastoma stem-like cell lines (PFS = progression free survival, OS = overall survival).

| Cell Line | Sex | Age (Years) | PFS (months) | OS (Months) |
|-----------|-----|-------------|--------------|-------------|
| NCH421k   | M   | 66          | 15           | 34          |
| NCH441    | M   | 75          | 22           | 31          |
| NCH644    | F   | 67          | 17           | 30          |

**Table S4:** shRNA nucleotide sequences

| shRNA              | Nucleotide Sequence   |
|--------------------|-----------------------|
| shNT               | CAACAAGATGAAGAGCACCAA |
| <i>PFKFB4</i> -sh1 | CCTGTGGCATATGGTTGTA   |
| <i>PFKFB4</i> -sh2 | GACGTGGTCAAGACCTACAAA |
| <i>PFKFB4</i> -sh3 | GCTGATTGGCTGCCACATTC  |
| <i>FBXO28</i>      | GAGAATGTTGAATCAGGGATT |
| <i>HIF1A</i> _UTR  | TGCTCTTTGTGGTTGGATCTA |
| <i>HIF1A</i>       | CCGCTGGAGACACAATCATAT |

**Table S5:** sgRNA sequences

| sgRNA           | Nucleotide Sequence  |
|-----------------|----------------------|
| PFKFB4 CRISPR_1 | TGTAGGTCTTGACCACGTCC |
| PFKFB4 CRISPR_2 | TGACCACGTCCCGGCGATAC |
| PFKFB3 CRISPR_1 | CAACGTCGGGGAGTATCGCC |
| PFKFB3 CRISPR_2 | TCAACGTCGGGGAGTATCGC |
| PFKFB3 CRISPR_3 | CTTCTTCGCCCCGACAATG  |

**Table S6:** Cloning primers

| <b>Primer</b>                        | <b>Nucleotide Sequence (5'-3')</b>  |
|--------------------------------------|-------------------------------------|
| FBXO28_F                             | GATCgaattcATGGCGGCAGCGGCG           |
| FBXO28_R                             | GCGCGtctagaGGGACACCATGTTGC          |
| PFKFB4_F                             | ACTGgaattcATGGCGTCCCCACGG           |
| PFKFB4_R                             | ACTGtctagaTCACTGGTGAGCAGGCACC       |
| SKP1_F                               | GGCCggatccATGCCTTCAATTAAGTTGCAGAG   |
| SKP1_R                               | GCGCaccggtTCACTTCTCTTCACACCACTG     |
| CUL1_F                               | GGCCggatccATGTCGTCAACCCGGAGC        |
| CUL1_R                               | GCGCaccggtTTAAGCCAAGTAACTGTAGGTGTCC |
| HIF1A_F                              | GCTAaggcccTACCATGGCCTACCCCTA        |
| HIF1A_R                              | CGATtctagaGCCGCCAGTGTGATGGATA       |
| NanoBiT <sup>®</sup> PFKFB4 C-term_F | ACTGacgctaGCACCATGGCGTCCCCACGG      |
| NanoBiT <sup>®</sup> PFKFB4 C-term_R | ACTGacgaatTCCCCTGGTGAGCAGGCACC      |
| NanoBiT <sup>®</sup> FBXO28 C-term_F | ACTGacgctaGCACCATGGCGGCAGCGGCG      |
| NanoBiT <sup>®</sup> FBXO28 C-term_R | ACTGacgaatTCCCCTTTCTATTCCGAAGACG    |
| NanoBiT <sup>®</sup> PFKFB4 N-term_F | ACTGacgaatTCAGCGTCCCCACGGGAA        |
| NanoBiT <sup>®</sup> PFKFB4 N-term_R | ACTGactctaGACTGGTGAGCAGGCACC        |
| NanoBiT <sup>®</sup> FBXO28 N-term_F | ACTGacgaatTCAGCGGCAGCGGCGGAG        |
| NanoBiT <sup>®</sup> FBXO28 N-term_R | ACTGactctaGATTACTTTCTATTCCGAAGACG   |
| N-LgBiT_F                            | ACTGacttcgAAATGGTCTTCACACTCG        |
| N-SmBiT_F                            | ACTGacttcgAAATGGTGACCGGCTACC        |
| C-LgBiT_R                            | ACTGactctaGATTAGCTGTTGATGGTACTCGG   |
| C-SmBiT_R                            | ACTGactctaGACTAGATTACAGAATCTCCTCG   |
| PFKFB4_F                             | ACTGacttcgAAATGGCGTCCCCAC           |
| FBXO28_F                             | ACTGacttcgAAATGGCGGCAGCGG           |
| HaloTag_F                            | ACTGacttcgAAATGGCAGAAATCGGTACTGG    |
| HaloTag_R                            | ACTGactctaGACGGCCTTACAGAATCTCC      |

**Table S7:** Mutagenesis primers

| <b>Primer</b>             | <b>Nucleotide Sequence (5'-3')</b> |
|---------------------------|------------------------------------|
| Mut_Hif1a_A1595G_F        | AATGAATTCAgGTTGGAATTGG             |
| Mut_Hif1a_A1595G_R        | GACCATATCACTATCCAC                 |
| Mut_Hif1a_A1613G_A1640G_F | ACAGAAGCAAgGAACCCATTTTC            |
| Mut_Hif1a_A1613G_A1640G_F | GTCTTCAGCAAAAAGTcTTTC              |

**Table S8:** RT-PCR primers

| <b>Primer</b> | <b>Nucleotide Sequence</b> |
|---------------|----------------------------|
| ARF1 fw       | GACCACGATCCTCTACAAGC       |
| ARF1 rev      | TCCCACACAGTGAAGCTGATG      |
| DCTN2 fw      | CGCCATGGCGACCCTAAAT        |
| DCTN2 rev     | TTGTCAGCTCCTCCGCATCGAA     |
| HIF1A fw      | AACCTGATGCTTTAACTTGCTG     |
| HIF1A rev     | CTTCCTCAAGTTGCTGGTCA       |
| HPRT fw       | TGACACTGGCAAAACAATGCA      |
| HPRT rev      | GGTCCTTTTCACCAGCAAGCT      |
| PFKFB4 fw     | CCACTCGGGAGTTCAATGTT       |
| PFKFB4 rev    | TTTTCAGGCCCTCTTCATTG       |
